# Supplementary material for: Epigenomic regulation of human T-cell leukemia virus by chromatin-insulator CTCF
Source: PubMed Central journal article supplement (PMC8174705; doi:10.1371/journal.ppat.1009577), 2021-05-21
Supplement: ppat.1009577.s005.pdf [file ppat.1009577.s005.pdf]

S5A Fig. Methylation in 5' LTR region (Sense strand)

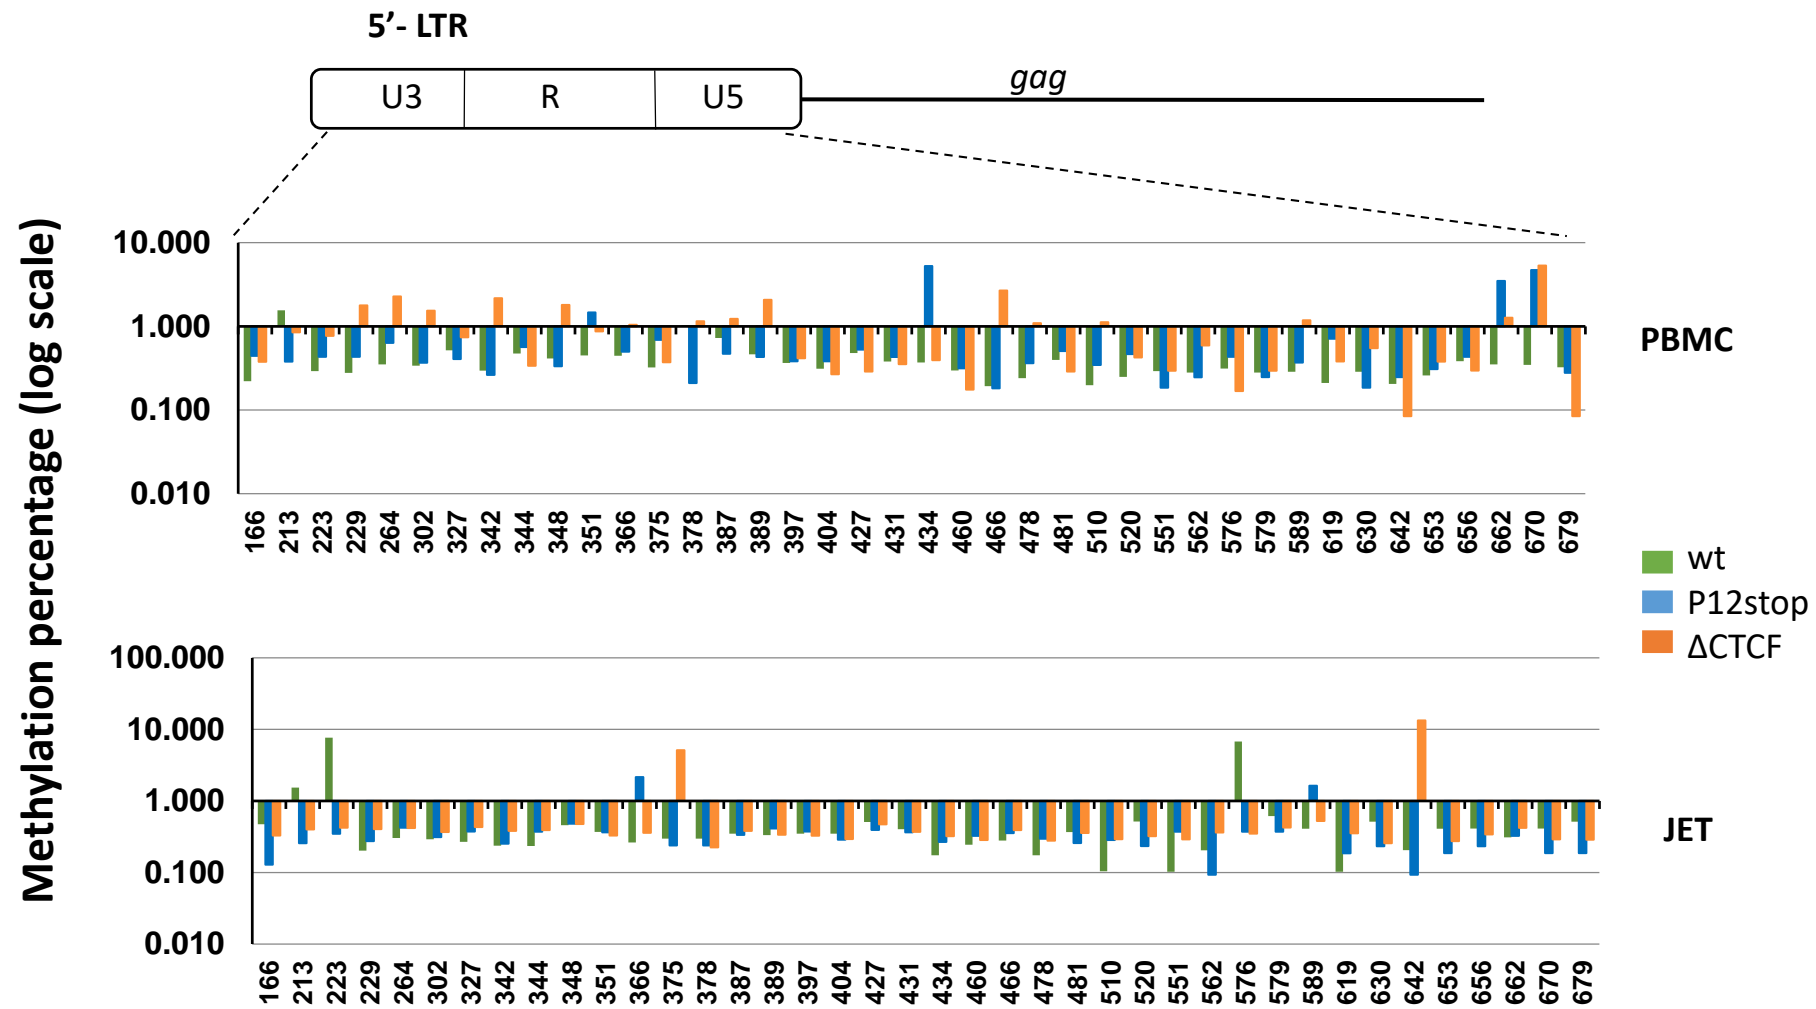

# S5B and 5C Fig

**B)**

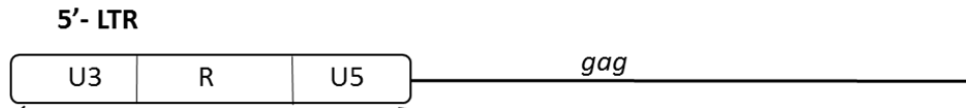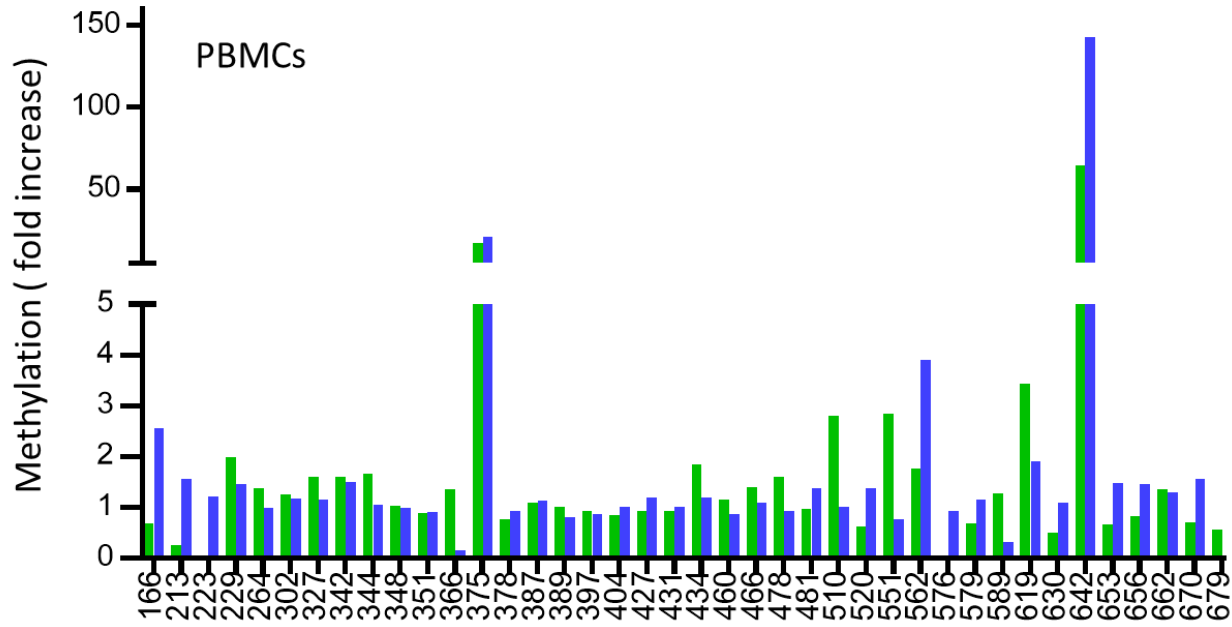

HTLV-1ΔCTCF vs HTLV-1 wt

**C)**

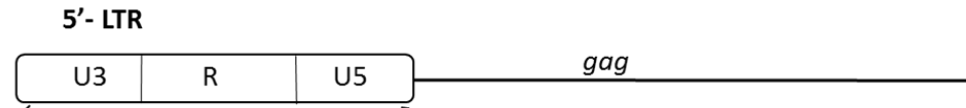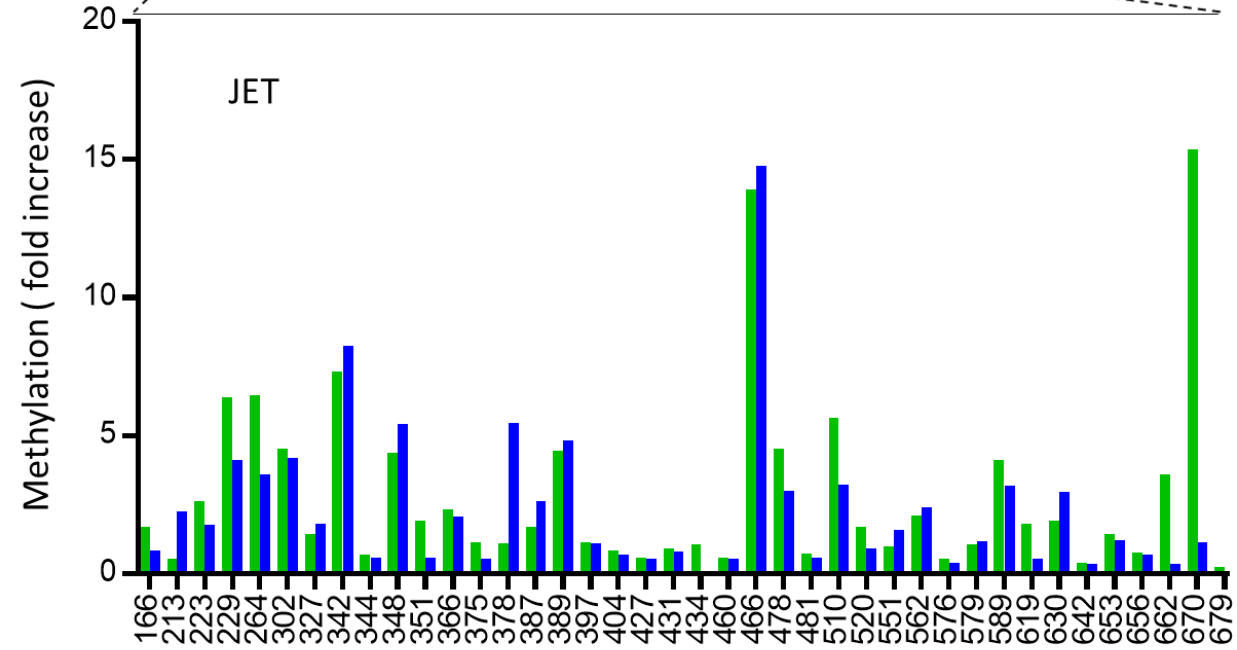

HTLV-1ΔCTCF vs HTLV-1p12stop

S5D Fig. Methylation in 3'-LTR region (antisense strand)

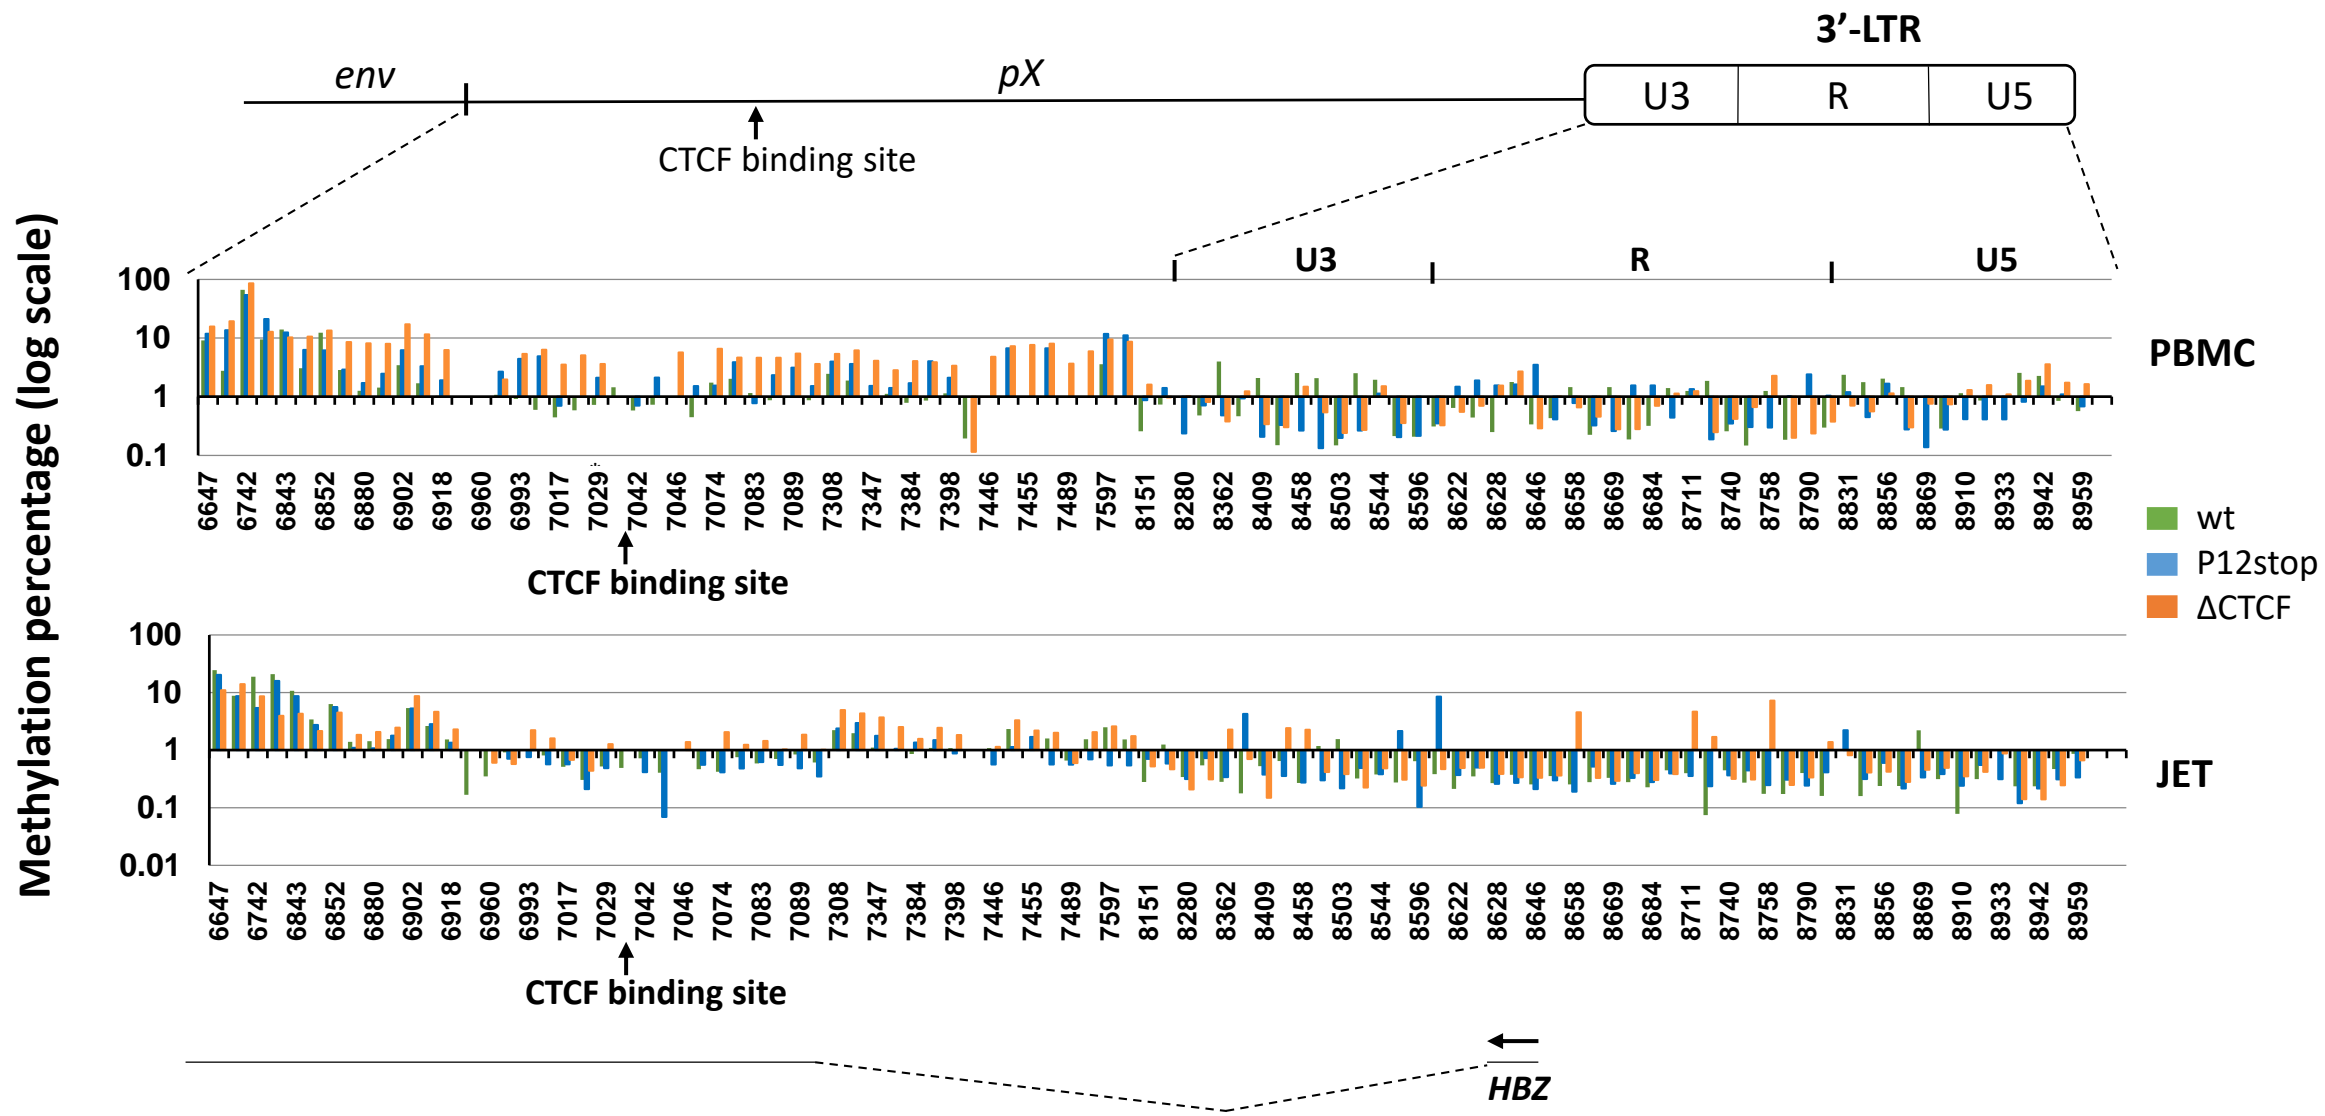

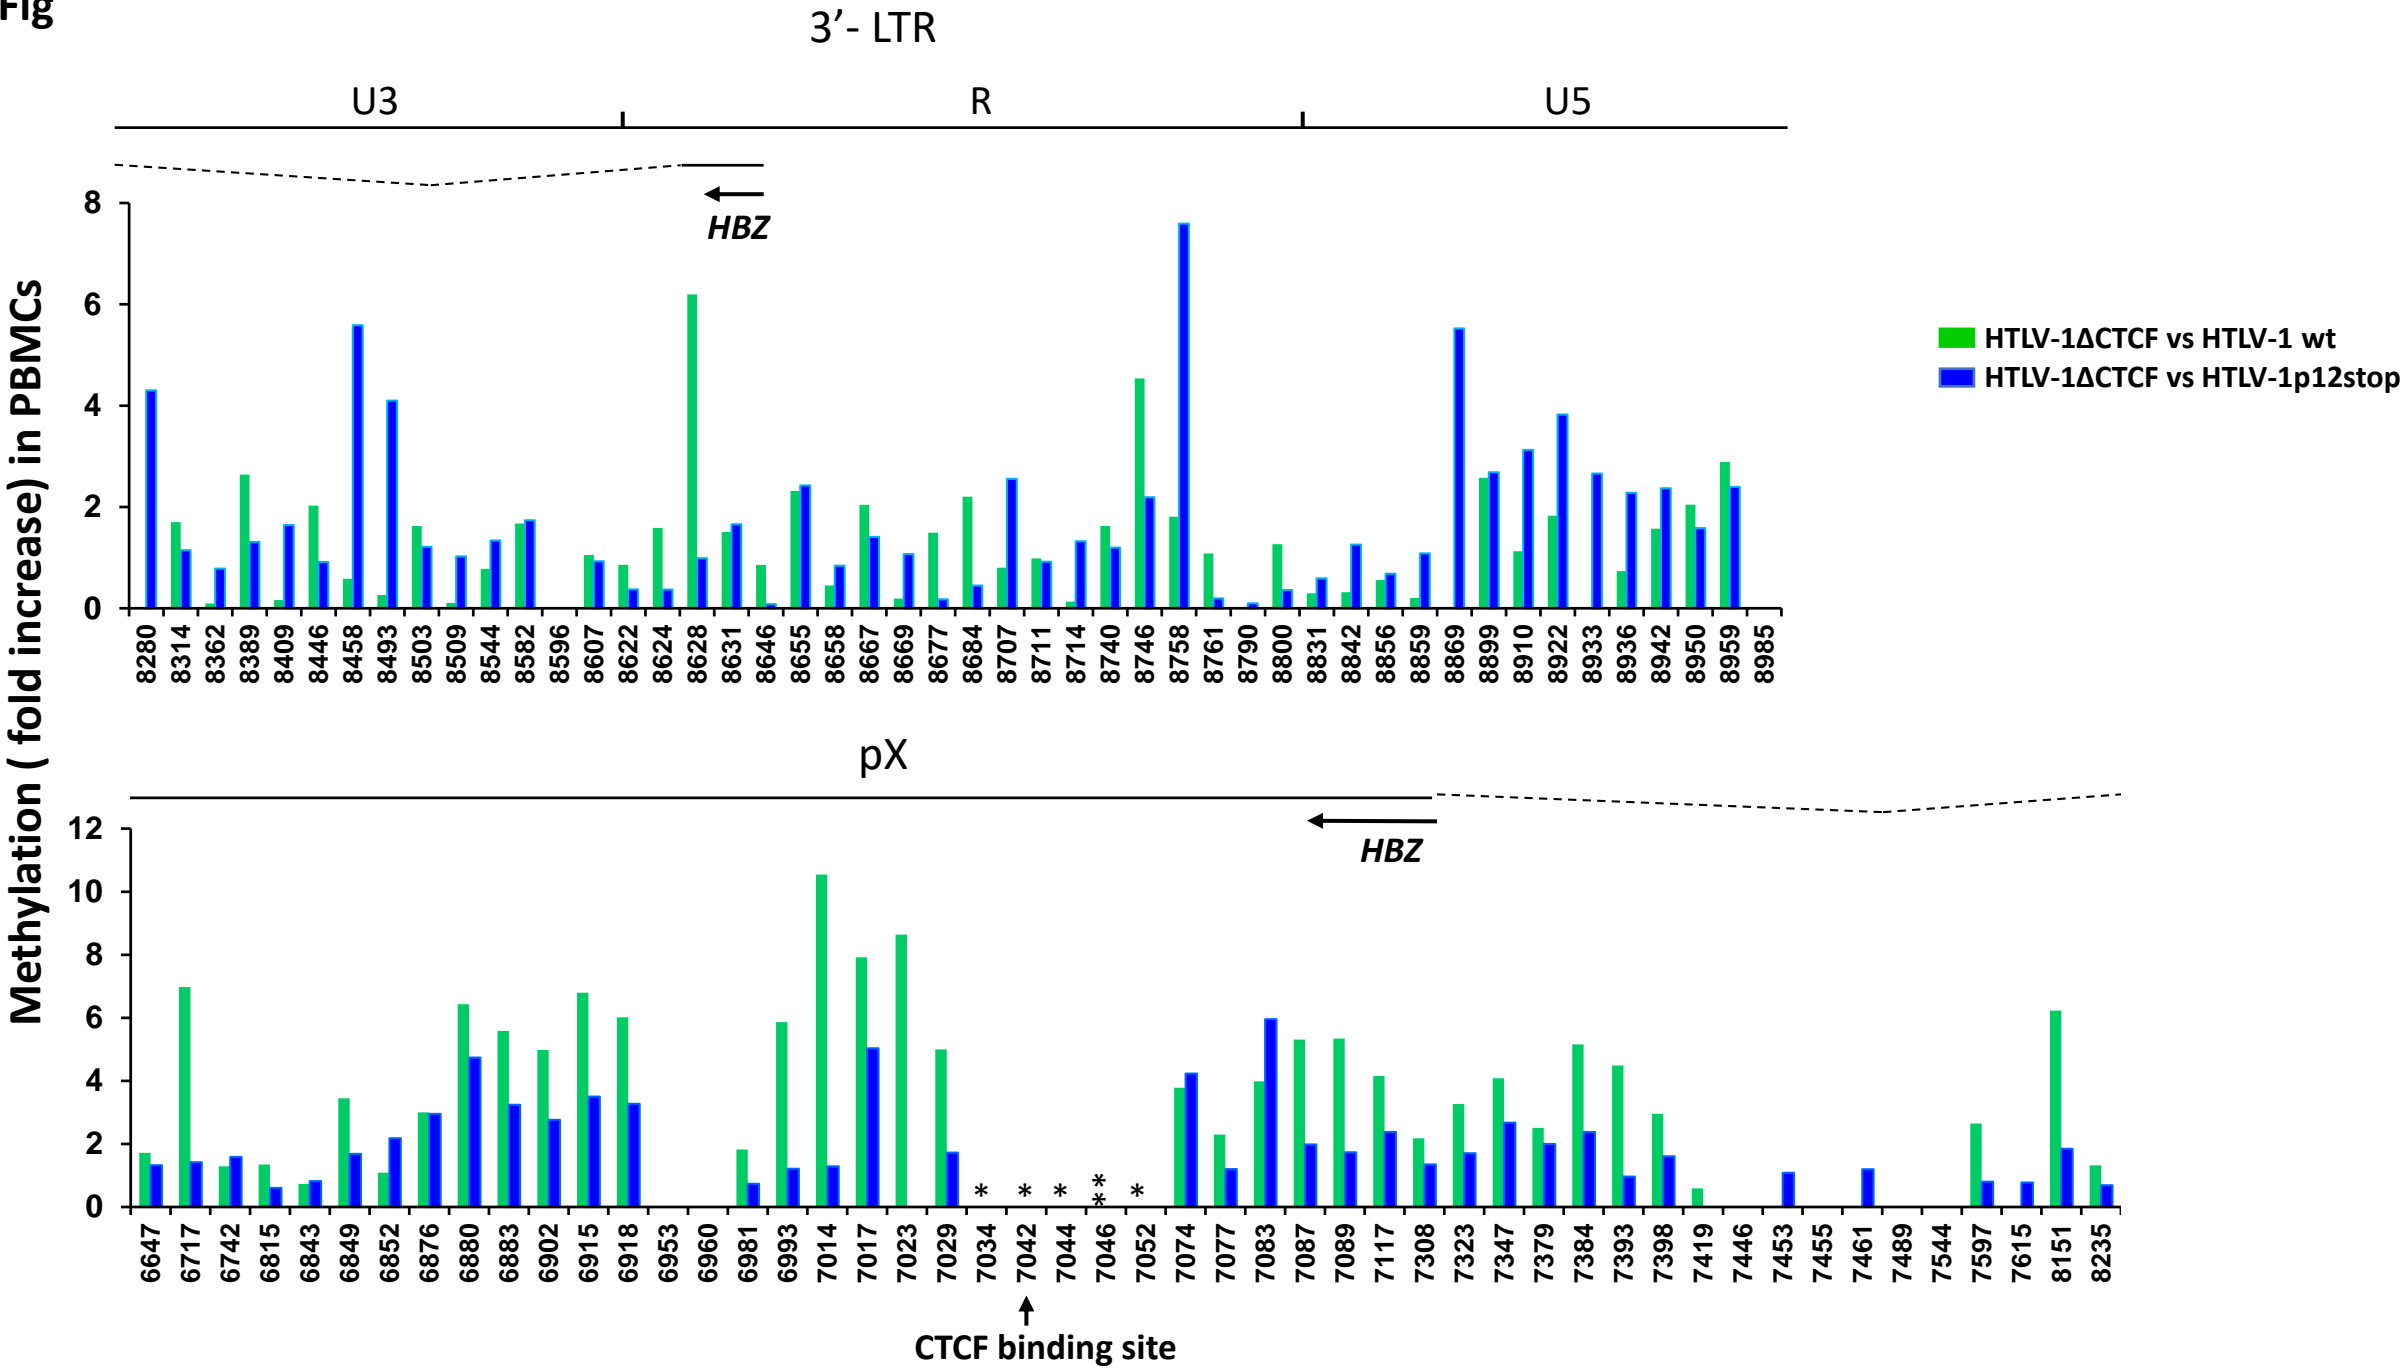

Methylation (fold increase) in JET cells

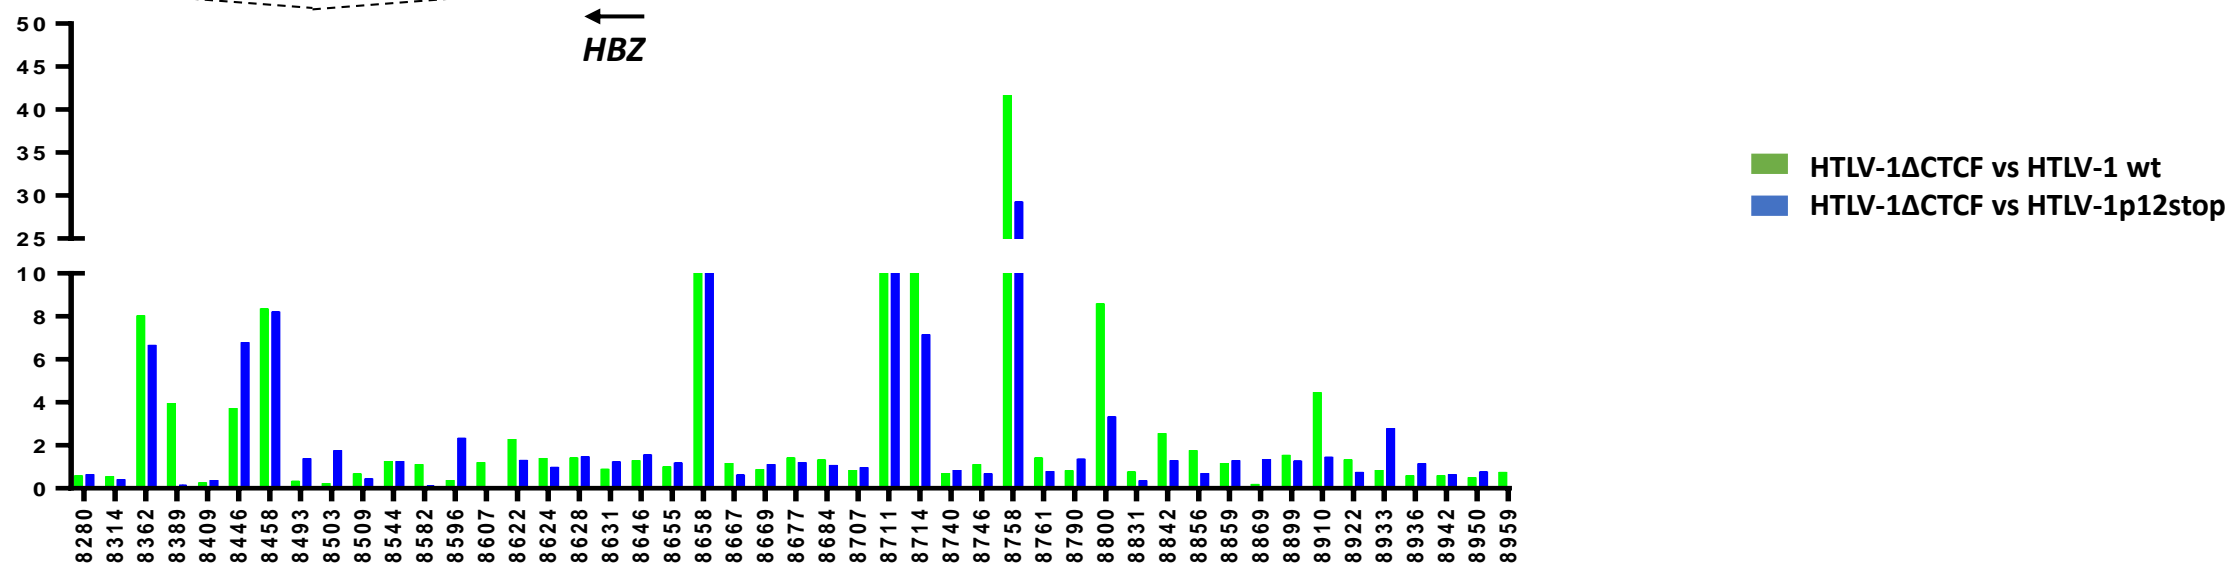

pX

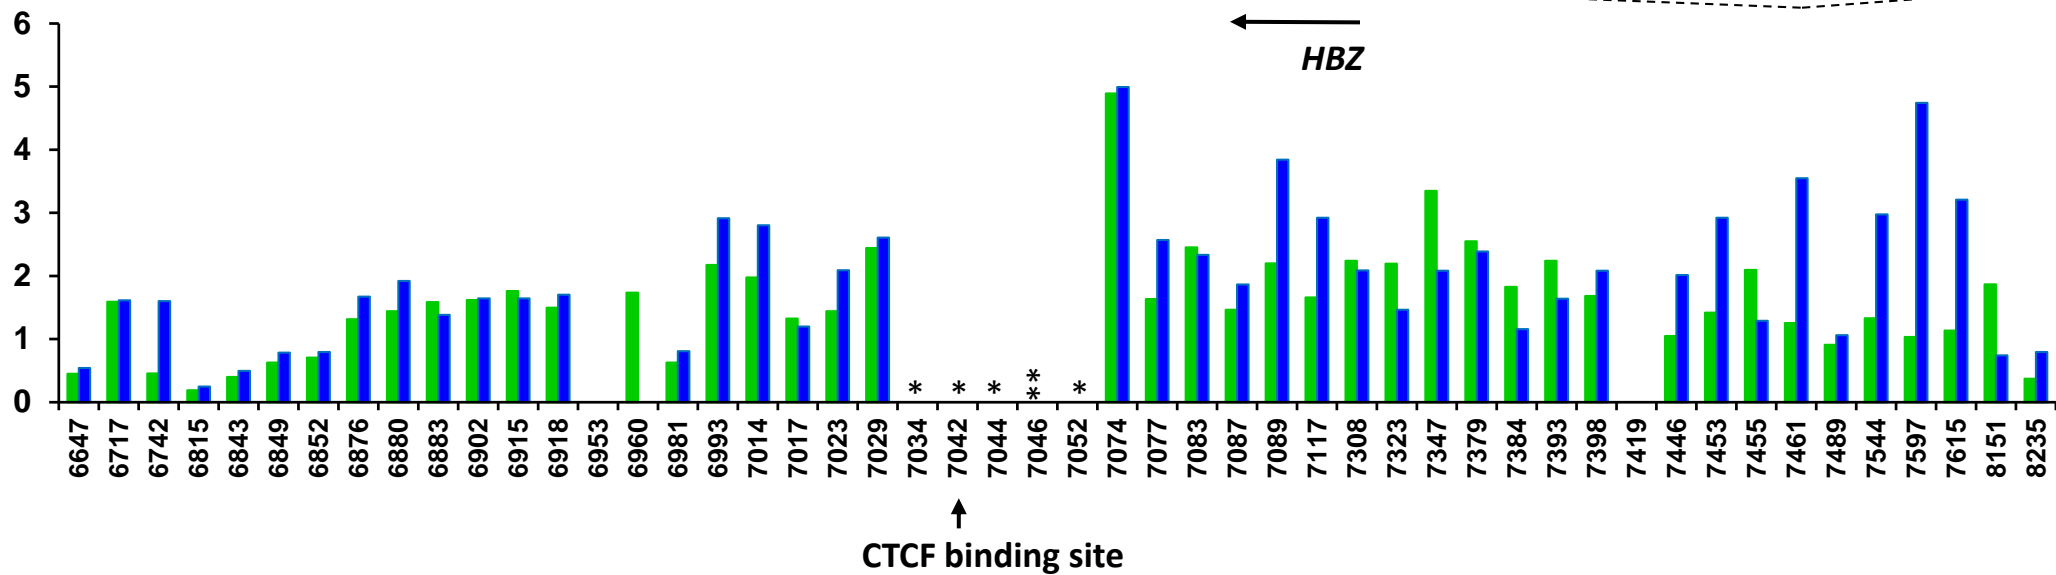

**S5 Fig. DNA methylation change in 5'LTR and 3'LTR of the HTLV-1 $\Delta$ CTCF compared to wild type HTLV-1 and HTLV-1p12stop provirus**

**A, D).** DNA methylation is presented as the percentage of methylated CpG (Y- axis) in 5'LTR (A), 3'LTR and *HBZ* on anti-sense strand (D) of HTLV-1 $\Delta$ CTCF compared to wild type HTLV-1 or HTLV-1p12stop provirus at the indicated locations of the viral DNA (X- axis). Upper panel: HTLV-1 immortalized PBMCs; lower panel: HTLV-1 infected JET cells.

**B, C).** DNA methylation is shown as a fold increase of methylated CpG (Y- axis) in 5'LTR of HTLV-1 $\Delta$ CTCF HTLV-1 compared to wild type HTLV-1 or HTLV-1p12stop provirus in PBMCs (B) and JET cells (C).

**E, F).** DNA methylation is shown as a fold increase of methylated CpG in 3'LTR and *HBZ* on anti-sense strand of HTLV-1 $\Delta$ CTCF compared to wild type HTLV-1 or HTLV-1p12stop provirus in PBMCs (E) and JET cells (F). Upper panel: 3'LTR; lower panel: *HBZ*. CTCF binding site: 7041-7052 as indicated by an arrow. \* Lost CpG sites, \*\* New CpG site due to the introduced mutations in vCTCF-BS.
