# Supplementary material for: Epigenomic regulation of human T-cell leukemia virus by chromatin-insulator CTCF
Source: PubMed Central journal article supplement (PMC8174705; doi:10.1371/journal.ppat.1009577), 2021-05-21
Supplement: ppat.1009577.s009.pdf [file ppat.1009577.s009.pdf]

S9 Fig

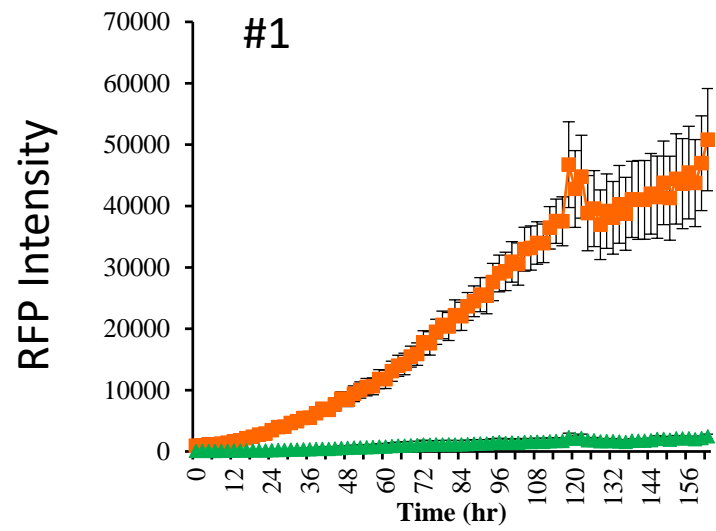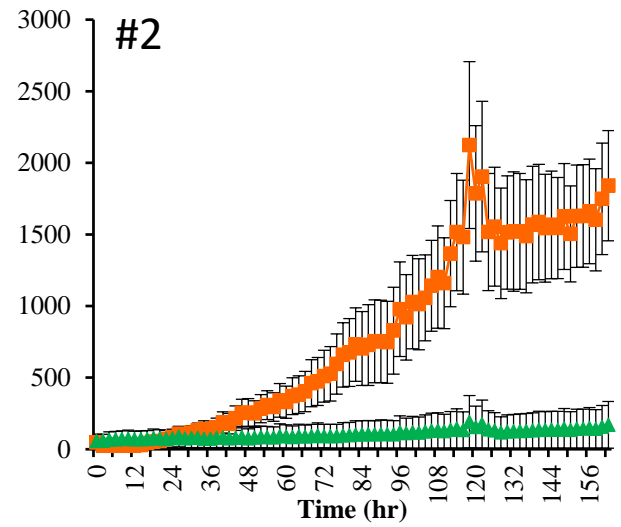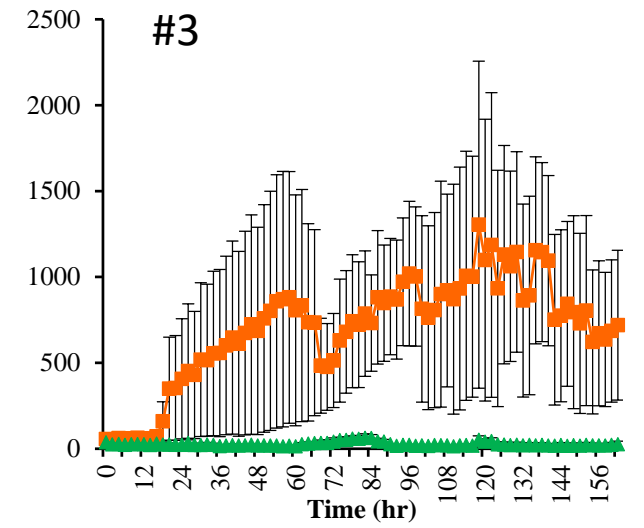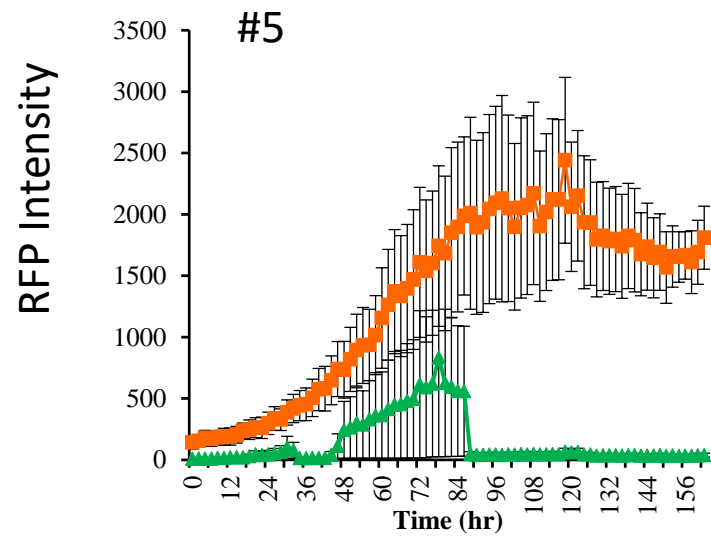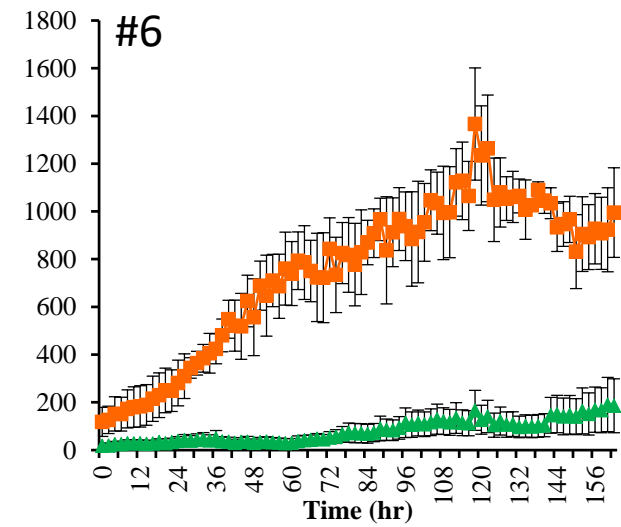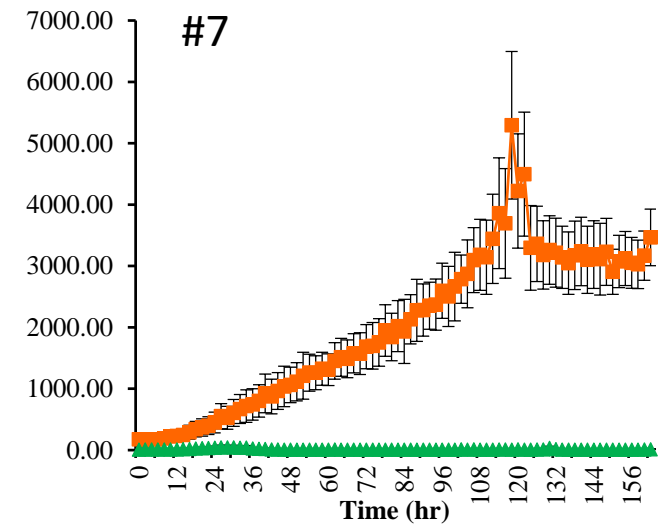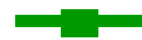

Control shRNA

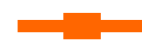

CTCF shRNA

S9 Fig

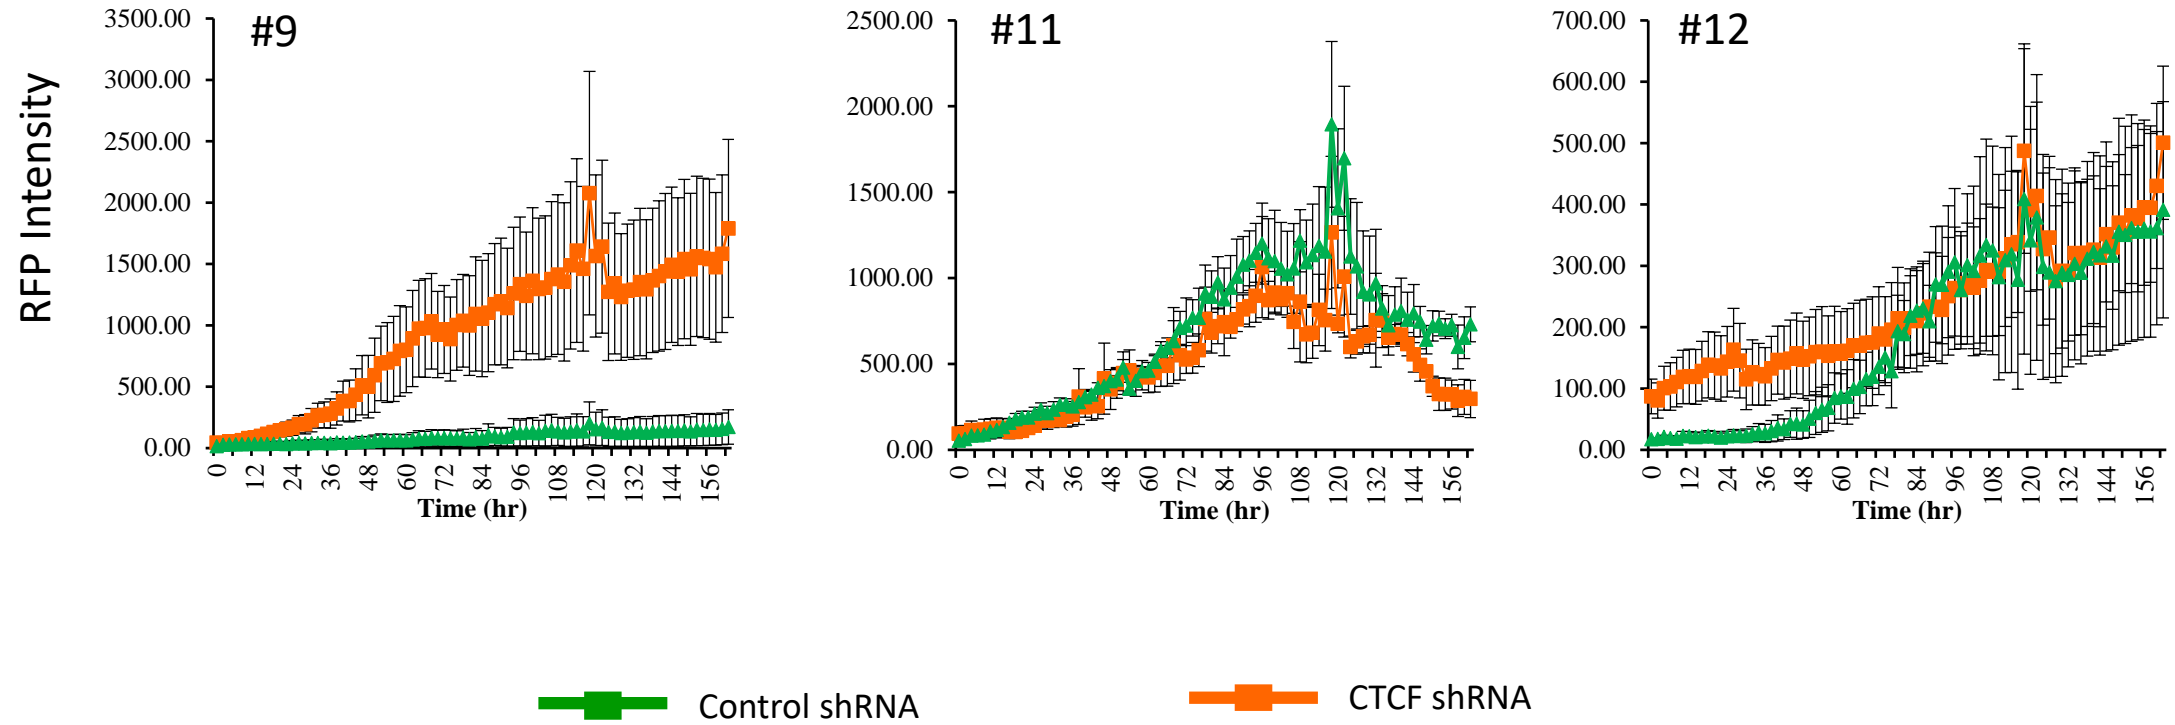

**S9 Fig. Inhibition of CTCF binding to HTLV-1 provirus affects proviral gene transcription**

Clonal HTLV-1 infected JET cell lines were generated, each carrying a single, latent provirus at a unique integration site. Viral gene expression was activated with CD3/CD8 antibodies and monitored by measuring Tax mediated RFP production (Y- axis) using the IncuCyte live cell image system.
