# Supplementary material for: Epigenomic regulation of human T-cell leukemia virus by chromatin-insulator CTCF
Source: PubMed Central journal article supplement (PMC8174705; doi:10.1371/journal.ppat.1009577), 2021-05-21
Supplement: ppat.1009577.s012.pdf [file ppat.1009577.s012.pdf]

S12 Fig

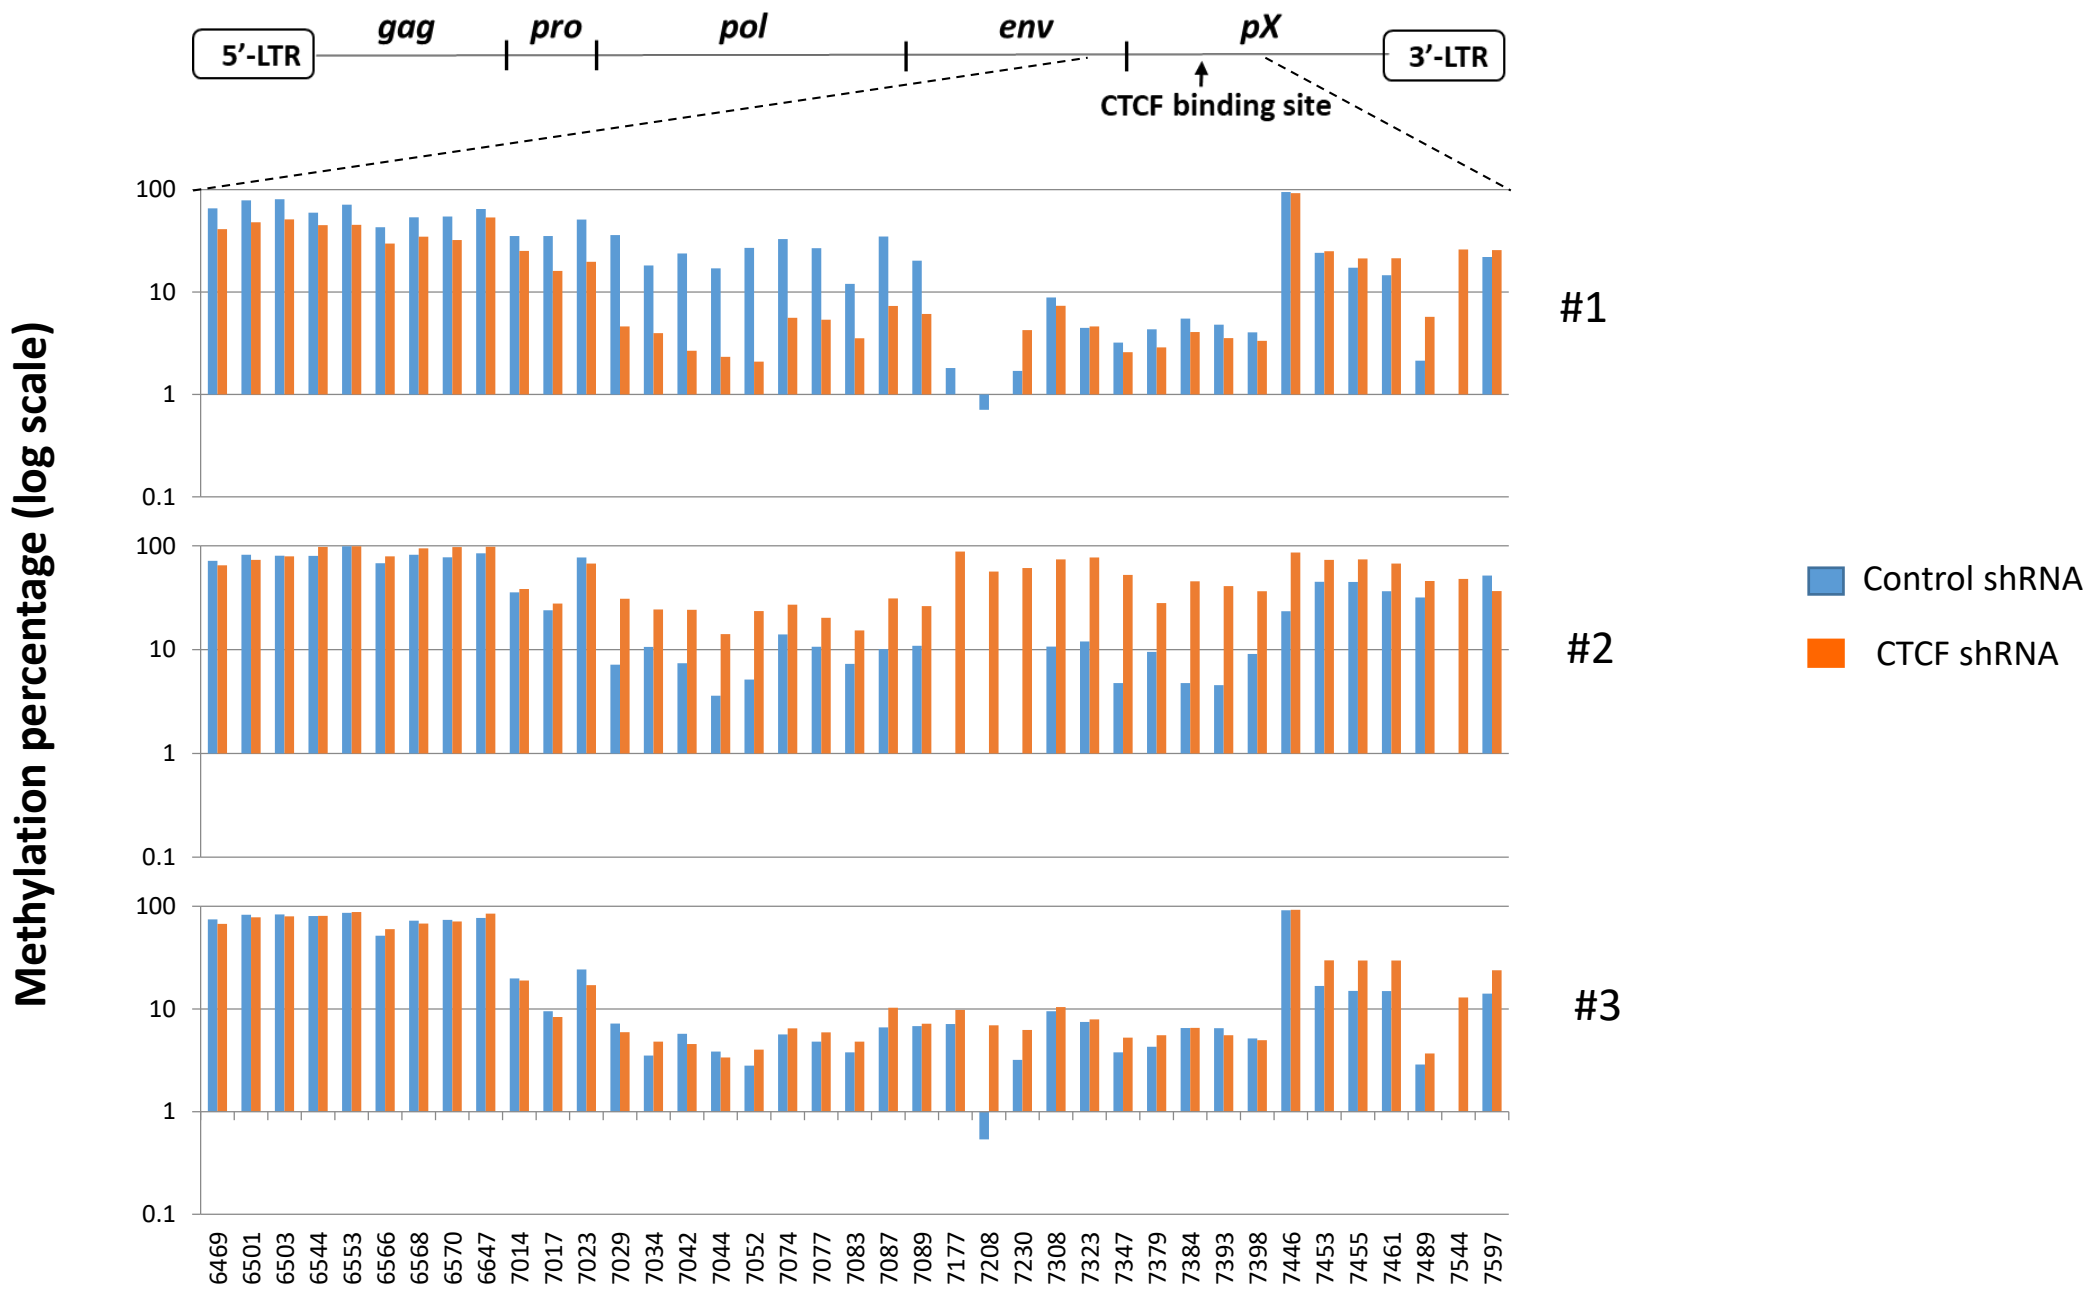

S12 Fig

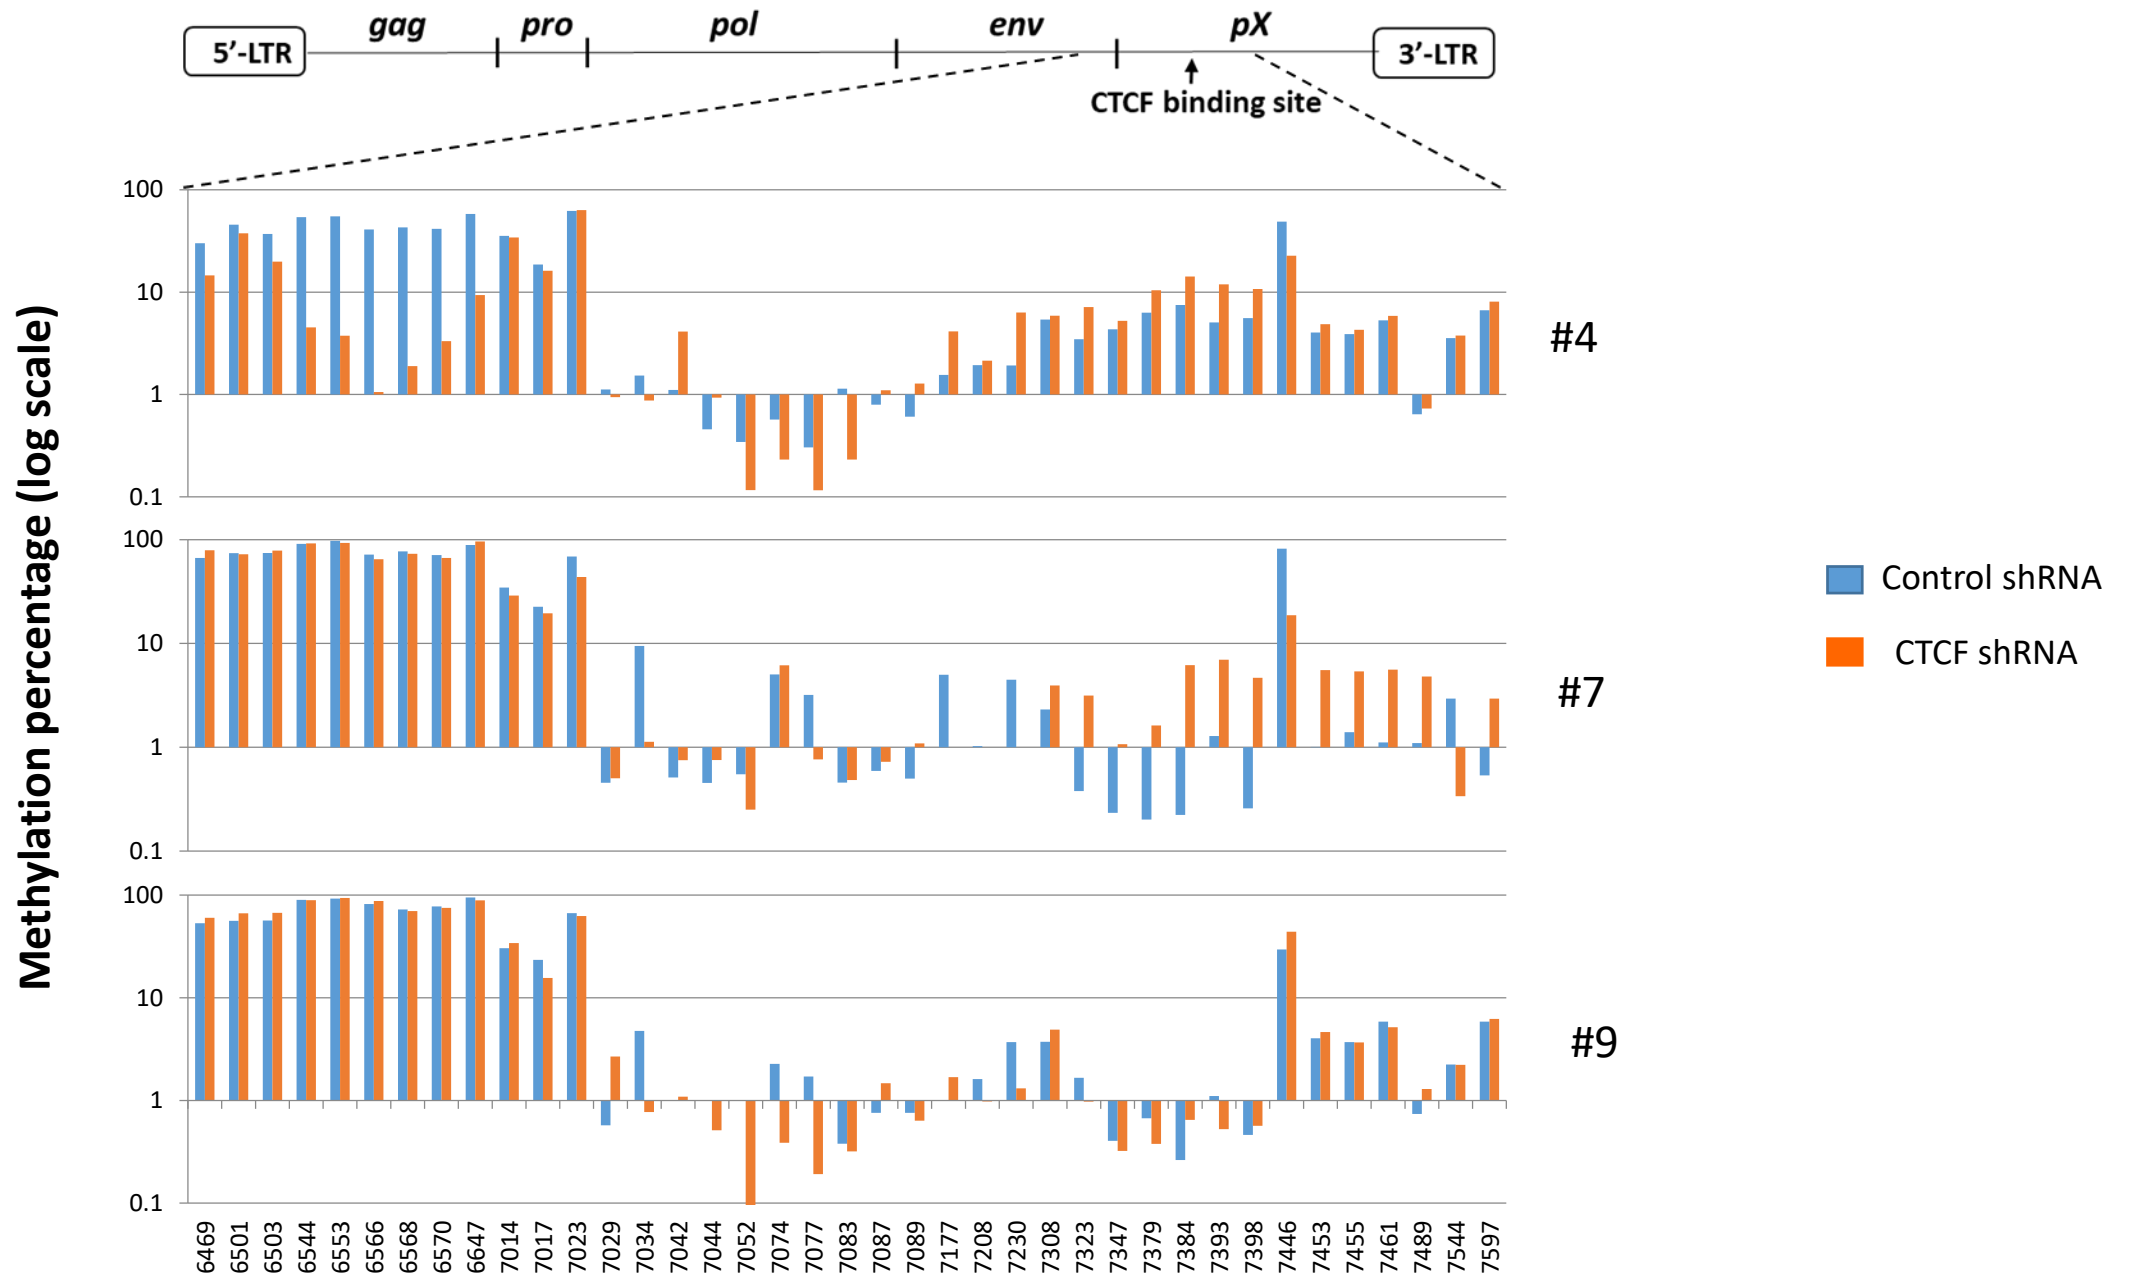

S12 Fig

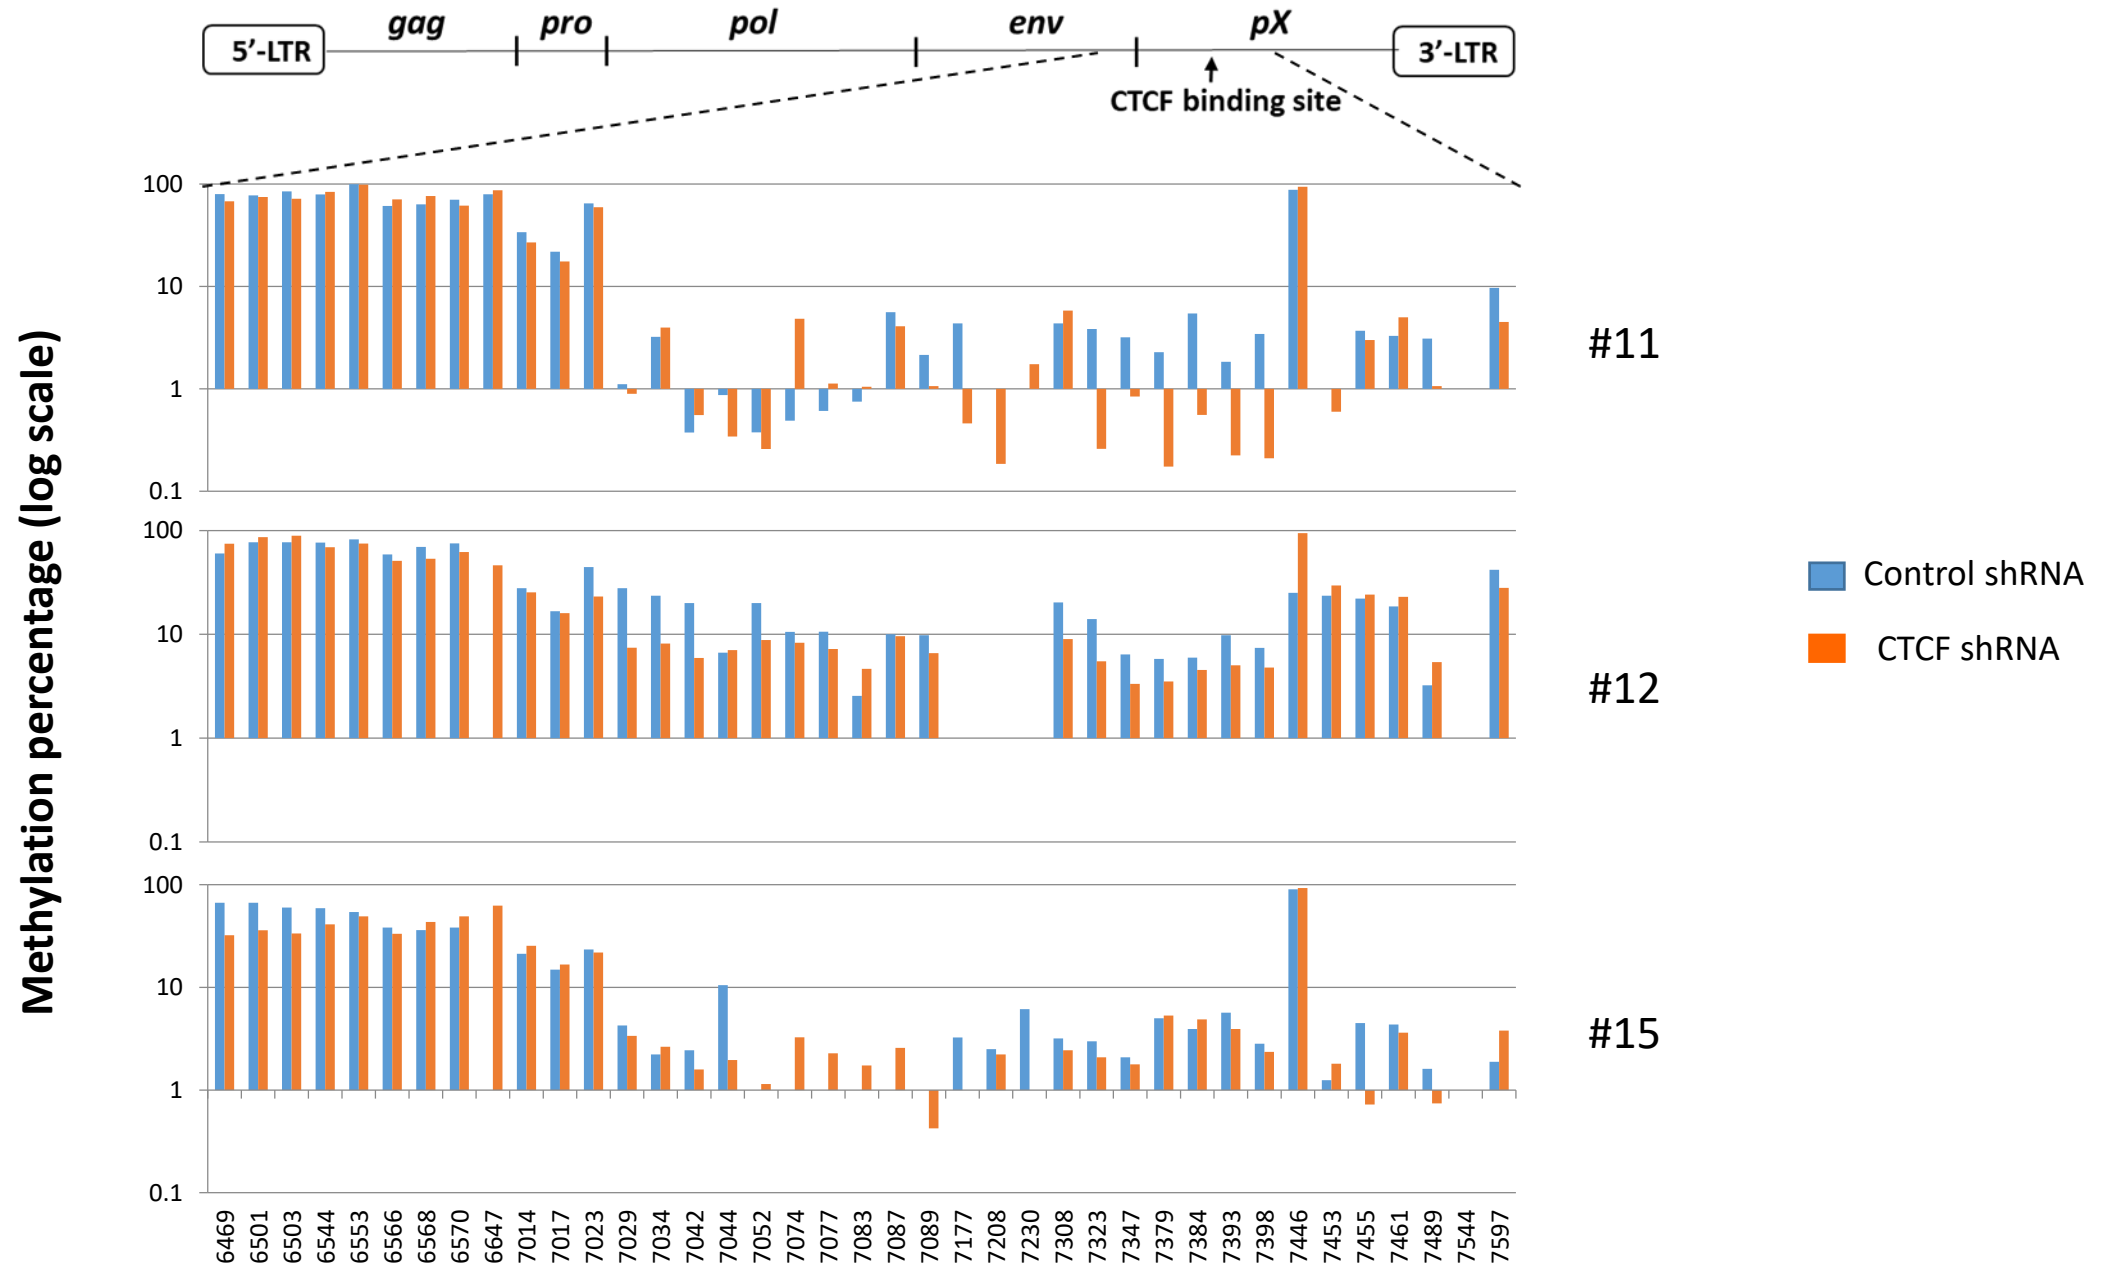

**S12 Fig. CTCF knock down by shRNA in JET clonal cell lines results in expansion of DNA methylation in the pX region of the provirus**

DNA methylation of the HTLV-1 provirus is presented the percentage of methylated CpG (Y- axis) at the indicated locations of the viral DNA in pX region (X-axis). The schematic diagram of HTLV-1 provirus indicates the regions examined by bisulfite treatment and DNA sequencing as described in the Materials and Methods. The number of each clonal cell line is labeled on the right side of the figure.
